# Supplementary material for: Effects of temperature and size class on the gut digesta microbiota of the sea urchin Tripneustes ventricosus
Source: PeerJ. 2024 Nov 28;12:e18298. doi: 10.7717/peerj.18298 (PMC11608566; doi:10.7717/peerj.18298)
Supplement: Supplemental Information 4 [file peerj-12-18298-s004.xlsx]

## Sheet: Supplementary Table 3
Supplementary Table 3. Relative abudance of Phylum and Genus level taxa across the two time periods
	Avg February	SD February	Avg August	SD August	12668.A31	12668.A35	12668.A36	12668.A32	12668.A33	12668.A34	12668.B25	12668.B26	12668.B27	12668.B28	12668.B29	12668.B30	12668.C33	12668.C34	12668.C31	12668.C32	12668.C35	12668.C36	13867.CGTV.4	13867.CGTV.2	13867.CTTV.1	13867.CGTV.3	13867.CGTV.5	13867.CGTV.6	13867.CGTV.1	13867.CTTV.4	13867.CTTV.3	13867.LQTV.1	13867.LQTV.3	13867.LQTV.4	13867.CTTV.5	13867.LQTV.6	13867.LQTV.5	13867.LQTV.2	13867.CTTV.6
Period					February	February	February	February	February	February	February	February	February	February	February	February	February	February	February	February	February	February	August	August	August	August	August	August	August	August	August	August	August	August	August	August	August	August	August
Phylum
p__Actinobacteriota	0.005	0.01	0	0	0.0191176	0.00760193	0.0377062	0.000387147	0.00108519	0.00346535	0.000817439	0	0.00257865	0	0	0	0	0.00285171	0	0.000498629	0	0.0182987	0	0	0	0	0	0	0	0	0	0	0	0	0	0	0	0	0
p__Bacteroidota	0.288	0.175	0.398	0.089	0.306618	0.391154	0.670856	0.00464576	0.385784	0.423267	0.131335	0.244147	0.109335	0.267186	0.204711	0.281788	0.247288	0.327471	0.274365	0.0491149	0.231953	0.640455	0.349388	0.369045	0.219473	0.344811	0.359296	0.408111	0.48524	0.447928	0.441099	0.429475	0.324838	0.613582	0.34907	0.321695	0.516838	0.387302	0.406866
p__Bdellovibrionota	0.002	0.002	0.002	0.003	0	0.000691085	0	0	0.00596853	0.00445545	0.00435967	0.00273639	0	0.000556638	0.00504767	0.00111049	0.00159541	0	0.000273	0	0.000530786	0	0.00598802	0	0.000806885	0.000969932	0.000502513	0.00772449	0.000731886	0.00391937	0.00287958	0.00486381	0	0.000266312	0.000232558	0.000232775	0.000285388	0.00502645	0.00407886
p__Desulfobacterota	0.052	0.045	0.111	0.07	0	0.0659986	0.051846	0.00116144	0.1465	0.15297	0.019346	0.0671937	0.00773595	0.0381297	0.0420639	0.0352582	0.100511	0.036597	0.0742561	0.00274246	0.0525478	0.0459941	0.115335	0.0928658	0.345347	0.0819593	0.140704	0.130029	0.0387899	0.0842665	0.115707	0.0938716	0.168416	0.101465	0.0404651	0.0686685	0.118151	0.0436508	0.0995921
p__Firmicutes	0.319	0.29	0.06	0.034	0.530147	0.189703	0.0919089	0.987611	0.15681	0.156931	0.345777	0.292794	0.772563	0.114111	0.0869321	0.14131	0.121889	0.171103	0.112476	0.919721	0.367834	0.177547	0.0765426	0.0481258	0.0788058	0.0414646	0.0711055	0.0292887	0.14345	0.0529115	0.0528796	0.0680934	0.0274863	0.0391478	0.109767	0.04446	0.00627854	0.0928571	0.0373895
p__Fusobacteriota	0.233	0.172	0.237	0.098	0.123529	0.114029	0.0549882	0.00503291	0.14433	0.107426	0.443052	0.286105	0.0732336	0.433621	0.477285	0.394503	0.405233	0.393536	0.440076	0.00598354	0.206476	0.0820969	0.238219	0.326965	0.194459	0.346993	0.221106	0.0959125	0.229324	0.133539	0.212042	0.233463	0.292104	0.121438	0.31093	0.425512	0.233447	0.348148	0.0652617
p__Marinimicrobia_(SAR406_clade)	0	0	0.005	0.004	0	0	0	0	0	0	0	0	0	0	0	0	0	0	0	0	0	0	0.00416558	0.00556227	0.00726197	0.00193986	0.00427136	0.00965562	0.0019517	0.00587906	0.00497382	0.00462062	0.001999	0.0045273	0.000697674	0	0.00656393	0.0010582	0.014276
p__Nanoarchaeota	0	0	0.001	0.001	0	0	0	0	0	0	0	0	0	0	0	0	0	0	0	0	0	0	0.00208279	0.000483676	0.00322754	0.00121242	0.00100503	0.00128742	0	0.00223964	0.0013089	0.000972763	0.00449775	0.00213049	0	0.00162942	0.000285388	0.000529101	0.00169952
p__Planctomycetota	0	0	0.003	0.002	0	0	0	0	0	0	0	0	0	0	0	0	0	0	0	0	0	0	0.00650872	0.00773881	0.00107585	0.00242483	0.00251256	0.00354039	0.00414735	0.00335946	0.00209424	0.00170233	0.00224888	0.000532623	0.00232558	0.0027933	0.00542237	0.00767196	0.00271924
p__Proteobacteria	0.086	0.056	0.145	0.052	0.0205882	0.194195	0.0683425	0.00116144	0.130765	0.113861	0.0501362	0.0942536	0.0288809	0.127192	0.176108	0.137701	0.0938098	0.0627376	0.0701611	0.0211917	0.121019	0.029179	0.185368	0.118742	0.116192	0.166828	0.136181	0.22562	0.0587948	0.201008	0.144764	0.148103	0.150925	0.0727031	0.174186	0.103817	0.101598	0.103968	0.253229
p__Spirochaetota	0.011	0.011	0.027	0.023	0	0.0307533	0.0243519	0	0.0260445	0.0346535	0.00217984	0.00881727	0.00464157	0.00528806	0.000560853	0.00360911	0.0127632	0	0.012012	0.000747943	0.0175159	0.00642928	0.0101536	0.0181378	0.0317375	0.00387973	0.0321608	0.0611522	0.0339107	0.0509518	0.0157068	0.00802529	0.0212394	0.041012	0.00511628	0.0167598	0.0071347	0.00899471	0.0904147
p__Verrucomicrobiota	0.005	0.006	0.01	0.009	0	0.00587422	0	0	0.00271297	0.0029703	0.00299728	0.00395257	0.00103146	0.0139159	0.00729108	0.0047196	0.0169113	0.00570342	0.01638	0	0.00212314	0	0.00624837	0.0123337	0.00161377	0.00751697	0.0311558	0.0276794	0.00365943	0.0139978	0.0065445	0.00680934	0.00624688	0.00319574	0.0072093	0.014432	0.00399543	0.000793651	0.0244731
Genus
g__Agarivorans	0	0	0.003	0.003	0	0	0	0	0	0	0	0	0	0	0	0	0	0	0	0	0	0	0.000781047	0.0019347	0.00699301	0.00266731	0.0057789	0.00965562	0	0.00195969	0.00052356	0.00437743	0.0049975	0.000266312	0.000465116	0.000698324	0.000856164	0.00026455	0.010877
g__AKAU3564_sediment_group	0	0	0.003	0.002	0	0	0	0	0	0	0	0	0	0	0	0	0	0	0	0	0	0	0.00650872	0.00773881	0.00107585	0.00242483	0.00251256	0.00354039	0.00414735	0.00335946	0.00209424	0.00170233	0.00224888	0.000532623	0.00232558	0.0027933	0.00542237	0.00767196	0.00271924
g__Candidatus_Hepatoplasma	0.165	0.338	0	0	0.00147059	0	0.00157109	0.98645	0	0.0217822	0.00408719	0.00212831	0.744714	0.00695797	0.00392597	0.00111049	0.000638162	0.0152091	0.000546001	0.912491	0.269108	0.00593472	0	0	0	0	0	0	0	0	0	0	0	0	0	0	0	0	0
g__Cutibacterium	0.005	0.01	0	0	0.0191176	0.00760193	0.0377062	0.000387147	0.00108519	0.00346535	0.000817439	0	0.00257865	0	0	0	0	0.00285171	0	0.000498629	0	0.0182987	0	0	0	0	0	0	0	0	0	0	0	0	0	0	0	0	0
g__Desulfotalea	0	0	0.074	0.051	0	0	0	0	0	0	0	0	0	0	0	0	0	0	0	0	0	0	0.0648269	0.0665054	0.246907	0.063773	0.091206	0.105246	0.0217126	0.0635498	0.0971204	0.0685798	0.0517241	0.0881491	0.0290698	0.0405028	0.0759132	0.015873	0.0618627
g__Desulfovibrio	0.006	0.006	0.011	0.011	0	0.0248791	0	0.000774294	0.0108519	0.00990099	0.0027248	0.013682	0.00618876	0.00862789	0.00560852	0.000277624	0.0102106	0.00380228	0.00764401	0.000747943	0.00159236	0	0.0413955	0.0050786	0.00295858	0.00557711	0.0168342	0.00997747	0.00561112	0.0145577	0.0065445	0.0177529	0.00349825	0.00159787	0.0072093	0.00512104	0.000570776	0.0119048	0.0333107
g__Ferrimonas	0.002	0.002	0.015	0.01	0	0.00276434	0	0.000387147	0.00271297	0.00247525	0.00163488	0.00304044	0.00257865	0.00278319	0.00701066	0.00277624	0.00255265	0	0.001092	0.000498629	0.00106157	0.00346192	0.032804	0.0251511	0.0201721	0.0130941	0.0246231	0.0280013	0.00634301	0.00839866	0.0198953	0.00802529	0.0107446	0.000798935	0.0293023	0.0118715	0.00171233	0.0119048	0.00509857
g__Fusibacter	0.119	0.121	0.043	0.026	0.502941	0.111956	0.0864101	0.00116144	0.0792187	0.0534653	0.316894	0.214959	0.0103146	0.0840523	0.0597308	0.104664	0.0772176	0.129753	0.0873601	0.00423835	0.081741	0.129575	0.0489456	0.03289	0.0672405	0.0288555	0.0517588	0.0138397	0.0966089	0.0324748	0.0431937	0.0539883	0.023988	0.0314248	0.0960465	0.0391061	0.00256849	0.0526455	0.0203943
g__Labilibacter	0.005	0.013	0.015	0.021	0	0.00380097	0.0542027	0	0.00651112	0.00940594	0	0	0.00412584	0	0	0.000555247	0.000957243	0.00142586	0.003003	0.000249314	0.00318471	0.00791296	0.016402	0.0345828	0.00322754	0	0.0140704	0.00579337	0.0341547	0	0.00026178	0.0160506	0.0457271	0	0	0.0100093	0.0770548	0	0.000339905
g__Lentimicrobium	0.005	0.007	0.002	0.003	0	0.0224603	0	0	0.0124797	0.00841584	0.00108992	0.00456066	0.00257865	0.000834957	0	0	0.00159541	0.00095057	0.010374	0	0.00212314	0.0148368	0.000781047	0	0.00161377	0.0014549	0	0.000643708	0	0.00503919	0	0	0.00524738	0.00878828	0.000930233	0	0.00285388	0	0.00781781
g__Marinimicrobia_(SAR406_clade)	0	0	0.005	0.004	0	0	0	0	0	0	0	0	0	0	0	0	0	0	0	0	0	0	0.00416558	0.00556227	0.00726197	0.00193986	0.00427136	0.00965562	0.0019517	0.00587906	0.00497382	0.00462062	0.001999	0.0045273	0.000697674	0	0.00656393	0.0010582	0.014276
g__Neiella	0	0	0.004	0.005	0	0	0	0	0	0	0	0	0	0	0	0	0	0	0	0	0	0	0.00546733	0.00241838	0.00215169	0.0014549	0.0040201	0.00579337	0.00219566	0.00055991	0.0188482	0.00243191	0.00249875	0	0.00139535	0.0027933	0.00142694	0.00132275	0.0101971
g__NS10_marine_group	0.012	0.016	0.008	0.006	0	0.0217692	0	0	0.0504612	0.05	0.00463215	0.0261478	0.00309438	0.00194823	0.00560852	0.014714	0.0108488	0.00095057	0.001365	0.000997258	0.00318471	0.0118694	0.00807082	0.00580411	0.00376546	0.00775946	0.0218593	0.00965562	0	0.0193169	0.0065445	0.00705253	0.00274863	0.00905459	0.0172093	0.00232775	0.00742009	0.0042328	0.0112169
g__Paramoritella	0	0	0.001	0.002	0	0	0	0	0	0	0	0	0	0	0	0	0	0	0	0	0	0	0.00650872	0	0.00403443	0.000242483	0.000502513	0.00160927	0.000243962	0.00111982	0.00104712	0.00218872	0.00149925	0.000798935	0.000697674	0.00116387	0.00142694	0.000793651	0.00101972
g__Persicobacter	0	0	0.015	0.027	0	0	0	0	0	0	0	0	0	0	0	0	0	0	0	0	0	0	0.00130174	0.000241838	0.0112964	0.00678953	0	0.0296106	0	0.0887458	0.015445	0.0053502	0.00574713	0.0756325	0.000697674	0.000232775	0.00228311	0	0.0193746
g__Photobacterium	0.064	0.048	0.097	0.043	0.0205882	0.08915	0.0141398	0.000774294	0.0922409	0.0836634	0.0310627	0.076619	0.0216607	0.118286	0.164049	0.131871	0.0820038	0.0503802	0.0526891	0.0132137	0.113057	0.0049456	0.109867	0.0730351	0.0502959	0.131426	0.0763819	0.1355	0.0402537	0.171333	0.0751309	0.108949	0.0744628	0.0537949	0.111628	0.0679702	0.0861872	0.0822751	0.199184
g__Propionigenium	0.233	0.172	0.237	0.098	0.123529	0.114029	0.0549882	0.00503291	0.14433	0.107426	0.443052	0.286105	0.0732336	0.433621	0.477285	0.394503	0.405233	0.393536	0.440076	0.00598354	0.206476	0.0820969	0.238219	0.326965	0.194459	0.346993	0.221106	0.0959125	0.229324	0.133539	0.212042	0.233463	0.292104	0.121438	0.31093	0.425512	0.233447	0.348148	0.0652617
g__Psychromonas	0.005	0.013	0.009	0.012	0	0.0549413	0	0	0.00434075	0.0039604	0	0.000304044	0	0.000278319	0.00196298	0	0.00255265	0.00617871	0.00737101	0.00124657	0.000530786	0	0	0.00435308	0.0134481	0.00921436	0.00527638	0.0276794	0	0.00363942	0.00680628	0.00802529	0.0467266	0.00932091	0.00627907	0.000232775	0	0.0010582	0.0112169
g__R76_B128	0.005	0.006	0.01	0.009	0	0.00587422	0	0	0.00271297	0.0029703	0.00299728	0.00395257	0.00103146	0.0139159	0.00729108	0.0047196	0.0169113	0.00570342	0.01638	0	0.00212314	0	0.00624837	0.0123337	0.00161377	0.00751697	0.0311558	0.0276794	0.00365943	0.0139978	0.0065445	0.00680934	0.00624688	0.00319574	0.0072093	0.014432	0.00399543	0.000793651	0.0244731
g__Roseimarinus	0.145	0.071	0.159	0.067	0.168382	0.178645	0.285153	0.00271003	0.181226	0.222772	0.0626703	0.146549	0.0484786	0.157529	0.130398	0.152415	0.136248	0.146863	0.143052	0.0431314	0.147558	0.248764	0.124967	0.0819831	0.105702	0.21581	0.123367	0.232378	0.0729446	0.128499	0.268325	0.171693	0.113943	0.272969	0.143488	0.137337	0.0716324	0.237831	0.204623
g__SCGC_AAA286_E23	0	0	0.001	0.001	0	0	0	0	0	0	0	0	0	0	0	0	0	0	0	0	0	0	0.00208279	0.000483676	0.00322754	0.00121242	0.00100503	0.00128742	0	0.00223964	0.0013089	0.000972763	0.00449775	0.00213049	0	0.00162942	0.000285388	0.000529101	0.00169952
g__Sediminispirochaeta	0	0	0.004	0.004	0	0	0	0	0	0	0	0	0	0	0	0	0	0	0	0	0	0	0.00234314	0.000241838	0.00295858	0.00121242	0.00326633	0.000965562	0.00341547	0.0176372	0.00157068	0.00170233	0.00149925	0.00106525	0.00116279	0.0104749	0.00256849	0.00714286	0.00373895
g__Spirochaeta_2	0.008	0.011	0.01	0.007	0	0.0269523	0	0	0.0233315	0.0336634	0.00190736	0.00820918	0	0.00222655	0.000280426	0.00360911	0.00989151	0	0.011466	0.000249314	0.0169851	0.0024728	0.00781047	0.0176542	0.00995159	0.00266731	0.028392	0.00804635	0.0136619	0.0209966	0.0117801	0.00632296	0.017991	0.00745672	0.00395349	0.00628492	0.00456621	0.00132275	0.00747791
g__uncultured	0.087	0.067	0.143	0.054	0.136029	0.0874223	0.284368	0.00154859	0.112317	0.0925743	0.0621253	0.0726665	0.0288809	0.0924019	0.0574874	0.0907829	0.0408424	0.123574	0.0668851	0.00224383	0.0323779	0.178042	0.110909	0.151149	0.124529	0.0768671	0.131156	0.068233	0.294462	0.12346	0.0926702	0.15929	0.172664	0.173103	0.147209	0.139432	0.214041	0.156878	0.0978926
g__V2072_189E03	0	0	0.013	0.022	0	0	0	0	0	0	0	0	0	0	0	0	0	0	0	0	0	0	0	0.000241838	0.0188273	0	0.000502513	0.0521403	0.0168334	0.012318	0.00235602	0	0.00174913	0.03249	0	0	0	0.000529101	0.0791978
g__vadinHA21	0.002	0.003	0.004	0.004	0	0.00310988	0	0.000387147	0.00379816	0.00742574	0.00027248	0.00121617	0	0	0.000560853	0.000555247	0.0051053	0.00427757	0.000273	0	0.007431	0	0.00416558	0.00652962	0.0034965	0.00363724	0.00653266	0.000965562	0.00536716	0.00335946	0.00314136	0.00145914	0.00149925	0.00186418	0.000930233	0.000232775	0.00371005	0.0010582	0.0193746
g__Vibrio	0.013	0.016	0.011	0.006	0	0.0473393	0.0542027	0	0.0282149	0.0193069	0.0160763	0.0130739	0.00464157	0.00389646	0.00280426	0.00222099	0.00446713	0.00570342	0.00764401	0.00598354	0.00530786	0.0207715	0.0270763	0.00822249	0.00860678	0.00800194	0.0138191	0.0157708	0.00609905	0.00951848	0.0115183	0.0109436	0.00374813	0.00612517	0.0223256	0.014432	0.00656393	0.00555556	0.010537
Not_Assigned	0.12	0.085	0.1	0.035	0.0279412	0.197305	0.127258	0.000387147	0.244167	0.267327	0.0479564	0.126786	0.0458999	0.0726412	0.0759955	0.0952249	0.192725	0.10884	0.142779	0.00822738	0.106157	0.271019	0.128352	0.1289	0.084185	0.0594083	0.120603	0.100418	0.14101	0.114502	0.0903141	0.098249	0.1002	0.0934754	0.0588372	0.0654097	0.186929	0.0492063	0.0768185
